# Supplementary material for: HESS Opinions: The sword of Damocles of the impossible flood
Source: Copernicus journal article supplement (doi:10.5194/hess-28-2603-2024), 2024-06-19
Supplement: Supplementary file 1 [file hess-28-2603-2024-supplement.zip]

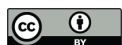

*Supplement of*

## **HESS Opinions: The sword of Damocles of the impossible flood**

**Alberto Montanari et al.**

*Correspondence to:* Alberto Montanari ([alberto.montanari@unibo.it](mailto:alberto.montanari@unibo.it))

- [hess-28-2603-2024-supplement-title-page.pdf](#)
- [AMS\\_Ahr\\_Altenahr.xlsx](#)

The copyright of individual parts of the supplement might differ from the article licence.
